# Supplementary material
Source: Springer Nature journal article supplement (https://www.springermedizin.de/resource/supplementary/12903_2014_473_MOESM4_ESM.pdf/9516780)
Supplement: MOESM4 [file 9516780]

## Enrollment

Assessed for eligibility (n=100)

Excluded (n=81)

- Not meeting inclusion criteria (n=52)
- Declined to participate (n=8)
- Other reasons (n=21)

Randomized (n=19)

## Allocation

Allocated to intervention (n=19)

- Received allocated intervention (n=11)
- Did not receive allocated intervention (only one infrabony defect) (n=8)

## Follow-Up

Lost to follow-up (health problem) (n=1)

Discontinued intervention (n=0)

## Analysis

Analysed (n=10)

- Excluded from analysis (n=0)
